# Supplementary material
Source: MDPI journal article supplement (https://www.mdpi.com/2221-3759/10/3/30)
Supplement: s1 [file s1]

## Supplementary Material

**Table S1.** Morphological and physiological defects previously described in zebrafish embryos/larvae exposed to acetaminophen, excluding studies describing effects on liver and kidney. Blank cells indicate *untested* parameters or those not explicitly reported.

|                                                              | Cedron et al<br>2020 | Nogueira et<br>al 2019                 | Xia et al 2017          | Reuter et al<br>2016                  | Galus et al<br>2013      | Zhang &<br>Gong 2013    | He et al 2013                     | Xu et al 2011        | David &<br>Pancharatna<br>2009 |
|--------------------------------------------------------------|----------------------|----------------------------------------|-------------------------|---------------------------------------|--------------------------|-------------------------|-----------------------------------|----------------------|--------------------------------|
| <b>APAP concentration(s)<br/>tested (mM)</b>                 | <b>2.5<br/>- 9.6</b> | <b>3.2x10<sup>-5</sup><br/>- 0.020</b> | <b>0.032<br/>- 3.25</b> | <b>3.2x10<sup>-3</sup><br/>- 3.25</b> | <b>0.003<br/>- 0.066</b> | <b>0.016<br/>- 0.16</b> | <b>1x10<sup>-4</sup><br/>- 10</b> | <b>0.025<br/>- 5</b> | <b>0.0066<br/>- 0.66</b>       |
| Reduced survivability                                        | Yes                  | NO (at<br>96 hpf)                      |                         |                                       | Yes                      | Yes                     | Yes                               |                      |                                |
| Reduced body length &<br>body mass                           |                      |                                        |                         |                                       |                          |                         |                                   |                      | Yes                            |
| Reduced CNS & spinal MN<br>axon length                       |                      |                                        |                         |                                       |                          | Yes                     |                                   |                      |                                |
| Spinal curvature                                             | Yes                  | Yes                                    |                         | Yes                                   | Yes                      |                         |                                   |                      |                                |
| Deformed tail & fin                                          |                      |                                        |                         |                                       |                          |                         |                                   |                      | Yes                            |
| Reduced pigmentation                                         | Yes                  | Yes                                    |                         | Yes                                   |                          |                         |                                   |                      | Yes                            |
| Failure to inflate swim<br>bladder                           |                      |                                        |                         | Yes                                   |                          |                         |                                   |                      |                                |
| Undetached tail at 24/48 hpf                                 |                      |                                        |                         |                                       |                          | Yes                     |                                   |                      |                                |
| Delayed yolk sac absorption                                  |                      |                                        |                         |                                       |                          |                         | Yes                               |                      |                                |
| Abnormal somite numbers<br>at 24/48 hpf                      |                      |                                        |                         |                                       |                          | Yes                     |                                   |                      |                                |
| Edema (peritoneal and/or<br>pericardial)                     | Yes                  |                                        |                         | Yes                                   | Yes                      |                         |                                   | Yes                  |                                |
| Pericardial blood<br>accumulation                            | Yes                  |                                        |                         |                                       |                          |                         |                                   |                      |                                |
| Abnormal heart looping &<br>reduced heart valve<br>formation |                      |                                        |                         |                                       |                          |                         |                                   | Yes                  |                                |
| Reduced heart rate                                           |                      |                                        |                         |                                       |                          |                         |                                   | Yes                  |                                |
| Reduced brain & eye<br>structures                            |                      |                                        |                         | Yes                                   |                          |                         |                                   |                      |                                |
| Craniofacial cartilage defects                               | Yes                  |                                        |                         |                                       |                          |                         |                                   |                      |                                |
| Delayed hatching                                             |                      | NO                                     | NO                      |                                       |                          | Yes                     |                                   |                      | Yes                            |
| Reduced touch response                                       |                      |                                        |                         |                                       |                          | Yes                     |                                   |                      |                                |
| Abnormal spontaneous<br>movement                             |                      | NO                                     |                         |                                       |                          |                         |                                   |                      |                                |
| Hyperactivity                                                |                      |                                        |                         | NO                                    |                          |                         |                                   |                      |                                |
| Reduced auditory and photo<br>responses                      |                      |                                        |                         |                                       |                          |                         |                                   |                      | Yes                            |
| Defects in equilibrium<br>(swimming behavior)                |                      | Yes                                    | NO                      |                                       |                          |                         |                                   |                      | Yes                            |

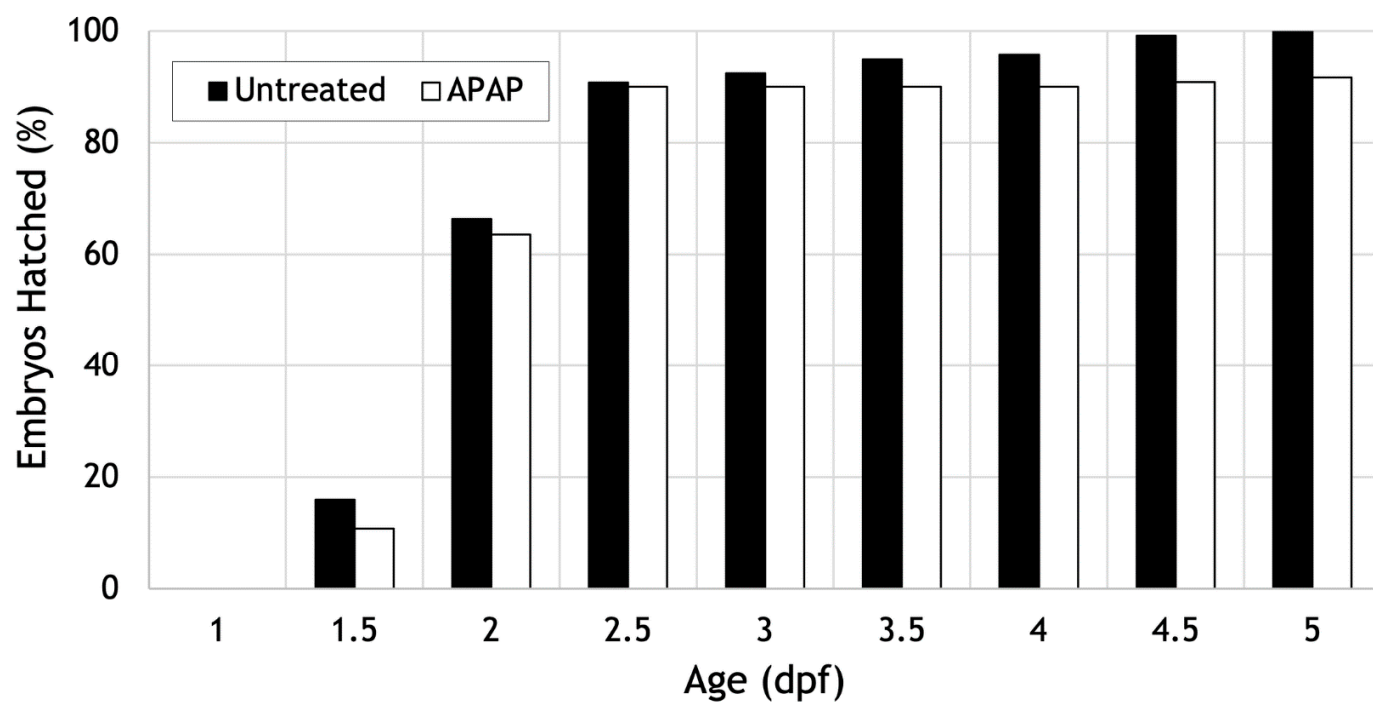

**Figure S1.** APAP treatment does not delay hatching. Untreated control embryos (n=119) and embryos continuously treated with 3.9-mM APAP (n=121) from 2 hpf onward were observed every 12 hours from 1 – 5 dpf. The earliest hatching occurred at 1.5 dpf, and all untreated embryos were hatched by 5 dpf. There was no significant difference between the hatching rates of untreated and APAP-treated embryos at any time point ( $p > 0.05$  at all time points).

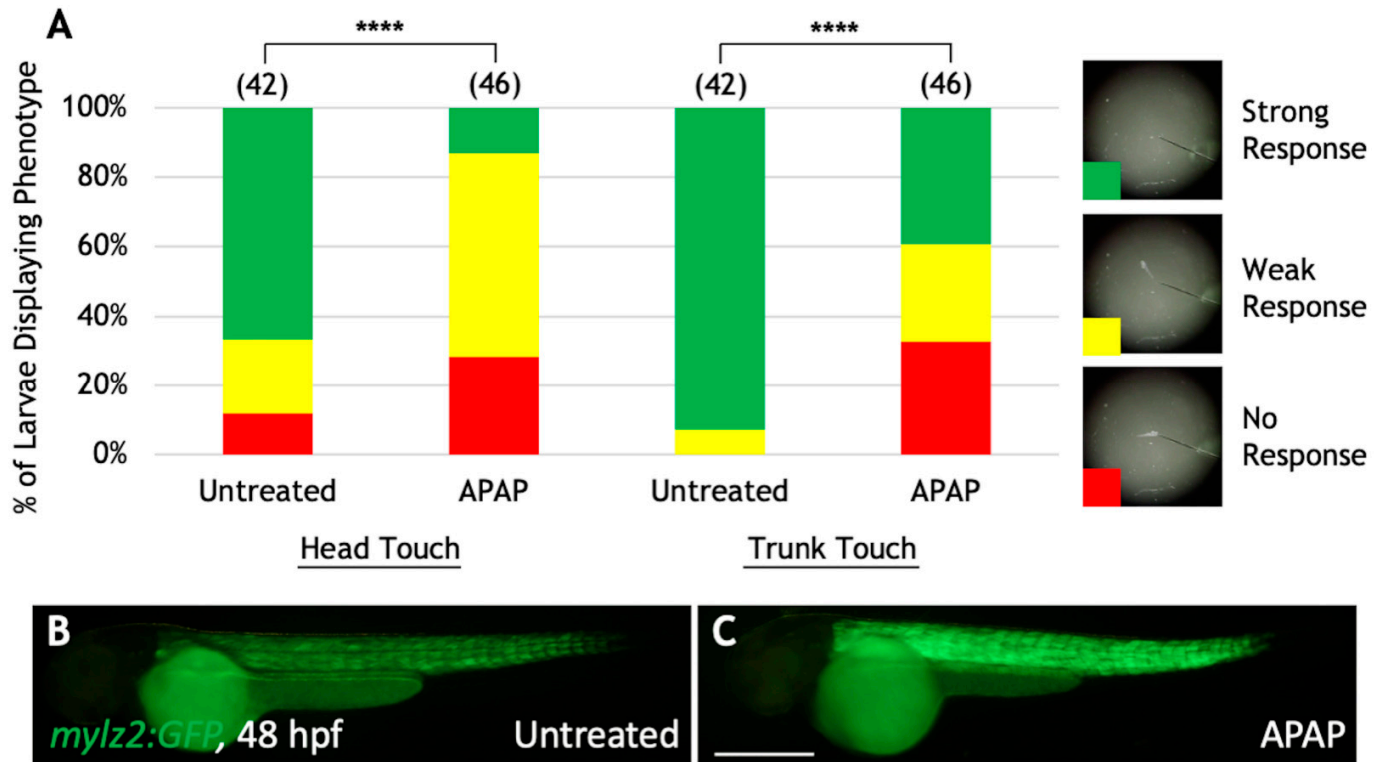

**Figure S2.** APAP-treated embryos exhibit defective touch responses. (A) Touch response assay. Following a single touch to either the head or trunk, 48-hpf embryo responses were scored within three categories: Strong Response (movement to outside of the field of view), Weak Response (movement remaining in the field of view), and No Response (no movement after touch). The field of view was 20 mm. APAP-treated embryos were significantly less responsive to both head and tail touches. The total number of embryos tested are in parentheses. \*\*\*\* = Chi-square test at  $p < 0.00001$ . (B-C) Lateral views of 48 hpf live-imaged *mylz2:GFP* embryos. GFP as an indicator of fast skeletal muscle is expressed in identical patterns throughout the trunk in untreated (B) and APAP-treated (C) embryos. Scale bar (in C) for B-C, 500  $\mu\text{m}$ .

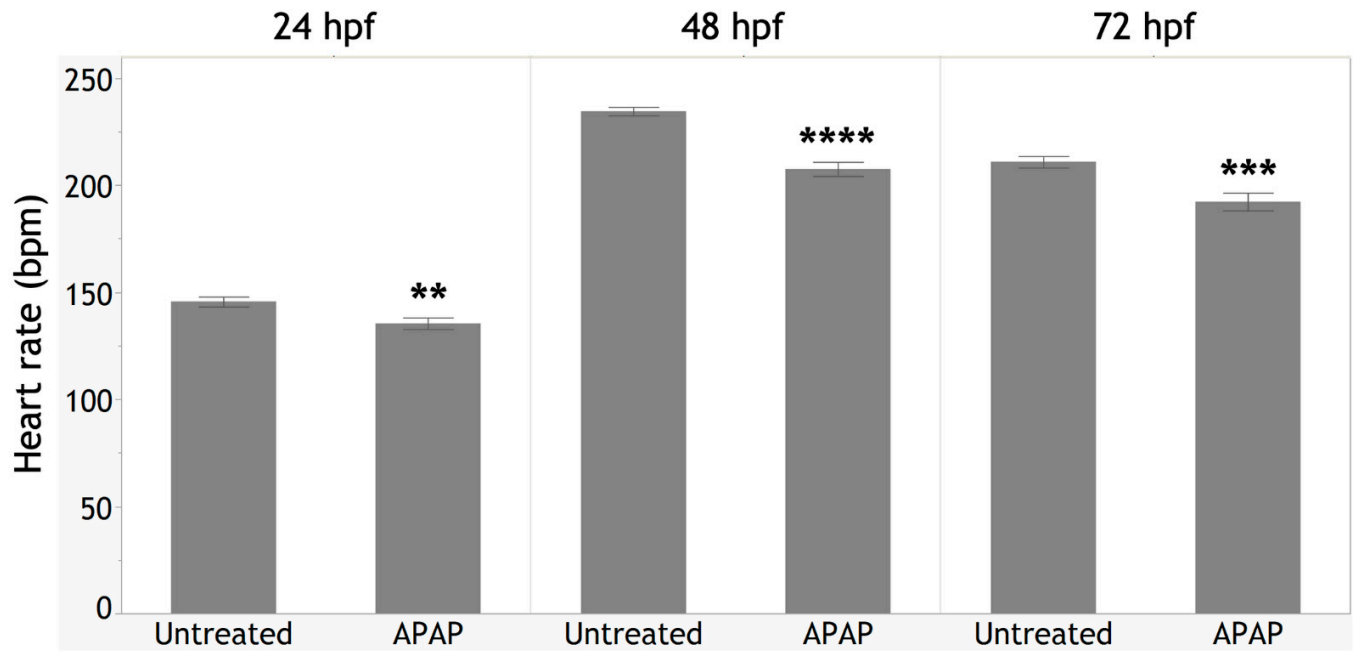

**Figure S3.** APAP treatment results in lower heart rates. Embryos were either continuously treated with 3.9-mM APAP (n=48) starting at 2 hpf, or untreated to serve as controls (n=48). The number of heart beats were counted for 10 seconds in each embryo, then multiplied by 6 to calculate beats per minute, represented as beats per minute  $\pm$  SEM. \*\* = t-test at  $p < 0.01$ . \*\*\* = t-test at  $p < 0.001$ . \*\*\*\* = t-test at  $p < 0.0001$ . Error bars indicate the standard error of the mean.

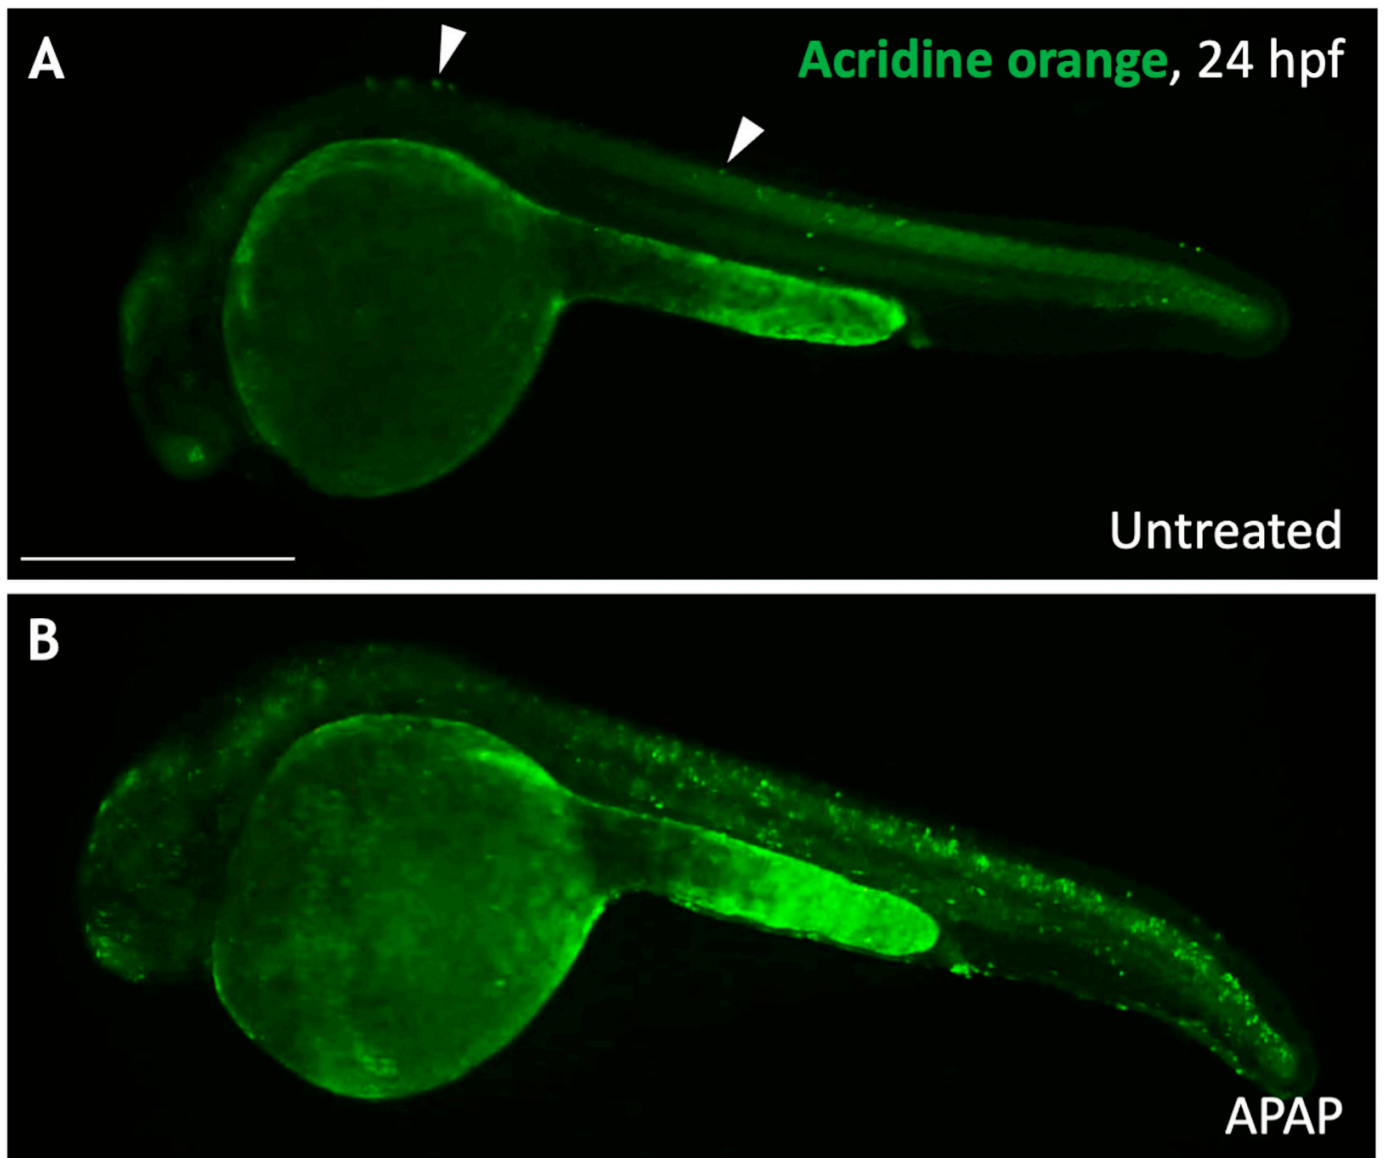

**Figure S4.** APAP-treated embryos have a widespread increase in apoptosis. (A-B) Lateral views of live 24-hpf embryos after incubation with acridine orange. In an untreated embryo (A), apoptotic cells (white arrowheads) are present in small numbers. In an APAP-treated embryo (B), substantially more apoptotic cells are present in both the head and tail regions. Scale bar (in A) for A-B, 500  $\mu\text{m}$ .
